# Supplementary material for: A comparison of the bone and growth phenotype of mdx, mdx:Cmah−/− and mdx:Utrn+/− murine models with the C57BL/10 wild-type mouse
Source: PubMed Central journal article supplement (PMC6994935; doi:10.1242/dmm.040659), 2020-01-10
Supplement: dmm-13-040659-s1.pdf [file dmm-13-040659-s1.pdf]

**Table S1.** Cortical bone parameters of tibiae from WT and muscular dystrophy mouse models as assessed by  $\mu$ CT. Data are presented as mean  $\pm$  SD (n>6); \* denotes p<0.05 compared to WT mice.

| Mouse type                                                  | 3 weeks at cull | 5 weeks at cull | 7 weeks at cull |
|-------------------------------------------------------------|-----------------|-----------------|-----------------|
| <b>Cortical tissue area, mm<sup>2</sup> (SD)</b>            |                 |                 |                 |
| WT                                                          | 0.62 (0.09)     | 0.71 (0.08)     | 0.94 (0.06)     |
| <i>mdx</i>                                                  | 0.56 (0.05)     | 0.81 (0.07)     | 0.92 (0.10)     |
| <i>mdx:utr<sup>+/-</sup></i>                                | 0.54 (0.06)     | 0.81 (0.05)     | 0.97 (0.08)     |
| <i>mdx:cmah<sup>-/-</sup></i>                               | 0.54 (0.07)     | 0.76 (0.06)     | 0.96 (0.08)     |
| <b>Cortical bone area, mm<sup>2</sup> (SD)</b>              |                 |                 |                 |
| WT                                                          | 0.29 (0.07)     | 0.41 (0.07)     | 0.58 (0.07)     |
| <i>mdx</i>                                                  | 0.25 (0.03)     | 0.48 (0.05)     | 0.60 (0.07)     |
| <i>mdx:utr<sup>+/-</sup></i>                                | 0.25 (0.03)     | 0.49 (0.02)     | 0.63 (0.05)     |
| <i>mdx:cmah<sup>-/-</sup></i>                               | 0.22 (0.03) *   | 0.46 (0.05)     | 0.62 (0.07)     |
| <b>Periosteal perimeter, in mm (SD)</b>                     |                 |                 |                 |
| WT                                                          | 3.01 (0.22)     | 3.16 (0.21)     | 3.74 (0.11)     |
| <i>mdx</i>                                                  | 2.85 (0.13)     | 3.42 (0.16)     | 3.69 (0.22)     |
| <i>mdx:utr<sup>+/-</sup></i>                                | 2.81 (0.18)     | 3.45 (0.10)     | 3.80 (0.16)     |
| <i>mdx:cmah<sup>-/-</sup></i>                               | 2.78 (0.20)     | 3.38 (0.19)     | 3.78 (0.17)     |
| <b>Endosteal perimeter, in mm (SD)</b>                      |                 |                 |                 |
| WT                                                          | 2.20 (0.11)     | 2.09 (0.09)     | 2.33 (0.09)     |
| <i>mdx</i>                                                  | 2.19 (0.11)     | 2.21 (0.09)     | 2.21 (0.17)     |
| <i>mdx:utr<sup>+/-</sup></i>                                | 2.08 (0.09)     | 2.19 (0.12)     | 2.23 (0.12)     |
| <i>mdx:cmah<sup>-/-</sup></i>                               | 2.15 (0.19)     | 2.09 (0.09)     | 2.22 (0.07)     |
| <b>Cortical thickness, in mm (SD)</b>                       |                 |                 |                 |
| WT                                                          | 0.50 (0.08)     | 0.52 (0.06)     | 0.51 (0.08)     |
| <i>mdx</i>                                                  | 0.46 (0.08)     | 0.55 (0.02)     | 0.49 (0.07)     |
| <i>mdx:utr<sup>+/-</sup></i>                                | 0.48 (0.07)     | 0.55 (0.03)     | 0.43 (0.06)     |
| <i>mdx:cmah<sup>-/-</sup></i>                               | 0.54 (0.04)     | 0.54 (0.02)     | 0.55 (0.02)     |
| <b>Mean polar moment of inertia, in mm<sup>4</sup> (SD)</b> |                 |                 |                 |
| WT                                                          | 0.05 (0.02)     | 0.06 (0.02)     | 0.12 (0.02)     |
| <i>mdx</i>                                                  | 0.04 (0.01)     | 0.09 (0.01)     | 0.12 (0.03)     |
| <i>mdx:utr<sup>+/-</sup></i>                                | 0.03 (0.01)     | 0.09 (0.01)     | 0.14 (0.02)     |
| <i>mdx:cmah<sup>-/-</sup></i>                               | 0.03 (0.01)     | 0.08 (0.01)     | 0.13 (0.03)     |
| <b>Mean eccentricity (SD)</b>                               |                 |                 |                 |
| WT                                                          | 0.57 (0.10)     | 0.55 (0.15)     | 0.52 (0.09)     |
| <i>mdx</i>                                                  | 0.47 (0.11)     | 0.60 (0.07)     | 0.59 (0.11)     |
| <i>mdx:utr<sup>+/-</sup></i>                                | 0.61 (0.10)     | 0.63 (0.03)     | 0.56 (0.07)     |
| <i>mdx:cmah<sup>-/-</sup></i>                               | 0.58 (0.10)     | 0.53 (0.06)     | 0.57 (0.11)     |

**Table S2.** Trabecular bone parameters of tibiae from WT and muscular dystrophy mouse models as assessed by  $\mu$ CT. Data are presented as mean  $\pm$  SD (n>6); \* denotes p<0.05 compared to WT mice.

| Mouse type                               | 3 weeks at cull | 5 weeks at cull  | 7 weeks at cull |
|------------------------------------------|-----------------|------------------|-----------------|
| <b>Trabecular thickness, in mm (SD)</b>  |                 |                  |                 |
| WT                                       | 0.03 (0.003)    | 0.04 (0.003)     | 0.04 (0.001)    |
| <i>mdx</i>                               | 0.03 (0.002)    | 0.04 (0.001)     | 0.04 (0.002)    |
| <i>mdx:utr<sup>+/-</sup></i>             | 0.03 (0.002)    | 0.04 (0.002)     | 0.04 (0.001)    |
| <i>mdx:cmah<sup>-/-</sup></i>            | 0.03 (0.001)    | 0.04 (0.002)     | 0.05 (0.003) *  |
| <b>Trabecular separation, in mm (SD)</b> |                 |                  |                 |
| WT                                       | 0.30 (0.05)     | 0.24 (0.05)      | 0.18 (0.02)     |
| <i>mdx</i>                               | 0.37 (0.07)     | 0.26 (0.04)      | 0.21 (0.02)     |
| <i>mdx:utr<sup>+/-</sup></i>             | 0.36 (0.03)     | 0.30 (0.06)      | 0.20 (0.02)     |
| <i>mdx:cmah<sup>-/-</sup></i>            | 0.29 (0.46)     | 0.23 (0.02)      | 0.19 (0.01)     |
| <b>Trabecular number, in 1/mm (SD)</b>   |                 |                  |                 |
| WT                                       | 2.04 (0.15)     | 2.64 (0.43)      | 3.10 (0.43)     |
| <i>mdx</i>                               | 2.08 (0.42)     | 2.17 (0.39)      | 2.67 (0.44)     |
| <i>mdx:utr<sup>+/-</sup></i>             | 2.06 (0.38)     | 1.96 (0.29) *    | 2.62 (0.45)     |
| <i>mdx:cmah<sup>-/-</sup></i>            | 2.66 (0.45) *   | 2.54 (0.35)      | 2.96 (0.41)     |
| <b>Structural Model Index (SD)</b>       |                 |                  |                 |
| WT                                       | 2.32 (0.08)     | 2.19 (0.10)      | 2.14 (0.10)     |
| <i>mdx</i>                               | 2.20 (0.10)     | 2.31 (0.11)      | 2.18 (0.07)     |
| <i>mdx:utr<sup>+/-</sup></i>             | 2.15 (0.10) *   | 2.31 (0.06)      | 2.21 (0.14)     |
| <i>mdx:cmah<sup>-/-</sup></i>            | 2.19 (0.09)     | 2.15 (0.13)      | 2.07 (0.19)     |
| <b>Connectivity (SD)</b>                 |                 |                  |                 |
| WT                                       | 618.9 (121.4)   | 867.3 (221.4)    | 1042.6 (195.2)  |
| <i>mdx</i>                               | 516.5 (147.2)   | 702.6 (136.8)    | 818.1 (207.2)   |
| <i>mdx:utr<sup>+/-</sup></i>             | 429.6 (108.8)   | 554.4 (78.1) *   | 897.5 (177.2)   |
| <i>mdx:cmah<sup>-/-</sup></i>            | 561.8 (72.5)    | 527.5 (107.8) ** | 723.3 (85.0)*** |

**Table S3.** Tibial length from WT and muscular dystrophy mouse models as assessed by  $\mu$ CT. Data are presented as mean  $\pm$  SD (n>6).

| Mouse type                    | Tibiae length, in mm (SD) |                 |                 |
|-------------------------------|---------------------------|-----------------|-----------------|
|                               | 3 weeks at cull           | 5 weeks at cull | 7 weeks at cull |
| WT                            | 13.02 (0.96)              | 14.93 (0.18)    | 16.07 (0.17)    |
| <i>mdx</i>                    | 12.07(0.49)               | 14.82 (0.59)    | 16.10 (0.35)    |
| <i>mdx:utr<sup>+/-</sup></i>  | 12.42 (0.12)              | 14.84 (0.84)    | 16.27(0.30)     |
| <i>mdx:cmah<sup>-/-</sup></i> | 12.45 (0.39)              | 14.99 (0.53)    | 16.60 (0.42)    |

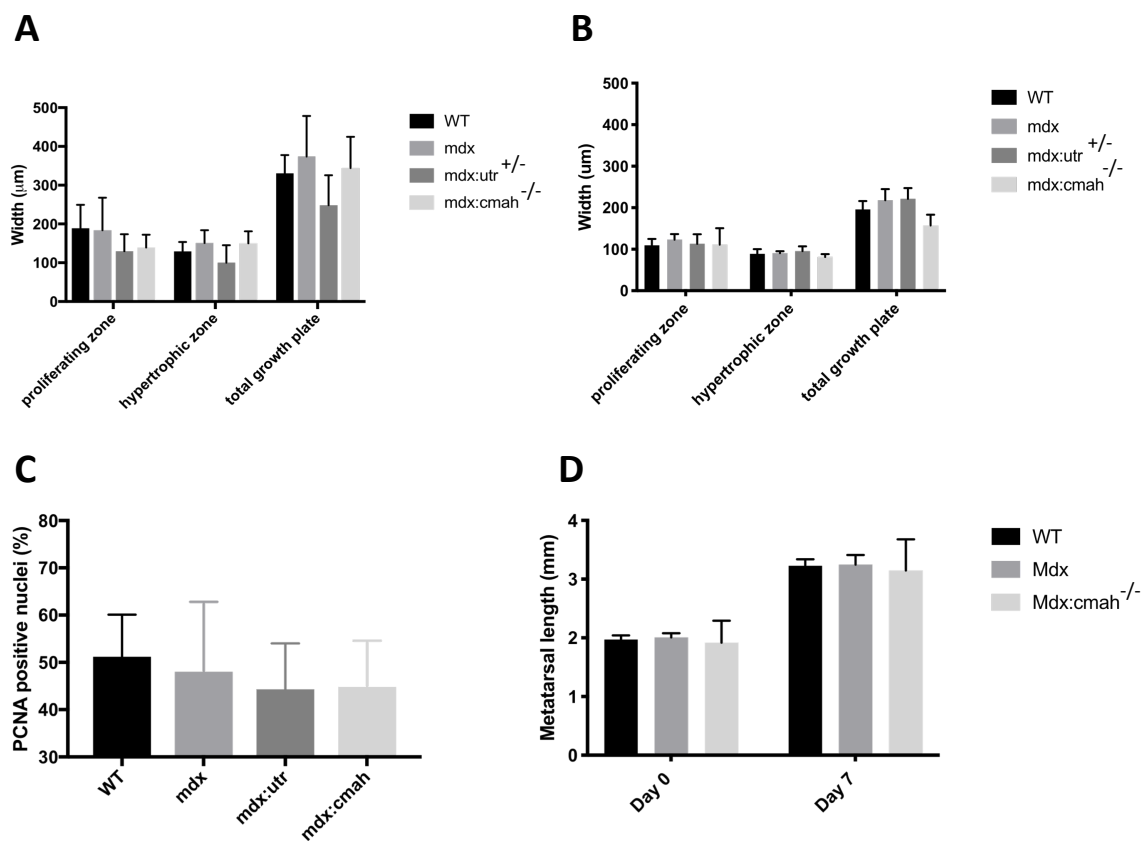

**Figure S1.** The width of the total growth plate and the individual proliferating and hypertrophic zones were similar at **A**) 3 weeks of age, and **B**) 7 weeks of age. **C**) The percentage of proliferating growth plate chondrocytes was similar in 3-week-old muscular dystrophy and WT mice. Data is presented as mean  $\pm$  SD ( $n > 6$ ). **D**) The growth of cultured embryonic (E18) metatarsals from muscular dystrophy and WT mice were similar. Data is presented as mean  $\pm$  SD ( $n = 12$  metatarsals).
